# Supplementary material for: A pilot study on searching for peri-nuclear NeuN-positive cells
Source: PeerJ. 2020 Jan 7;8:e8254. doi: 10.7717/peerj.8254 (PMC6953339; doi:10.7717/peerj.8254)
Supplement: Figure S6 — Quantitative analysis of IF of Figure 3: the number of NeuN-positive cells (green) and total cells (blue), and the relative NeuN-positive cell rate was calculated. [file peerj-08-8254-s006.xls]

## Sheet: IF from Figure 5
count	NeuN（green）			Blue				G/B	G/B	G/B			SD
Brain	65	50	59	106	105	101		61.3208	47.619	58.4158	brain	55.7852	7.21972
heart	35	36	35	116	159	148		30.1724	22.6415	23.6486	heart	25.4875	4.08836
duodenum	436	401	430	561	437	508		77.7184	91.762	84.6457	duodenum	84.7087	7.02204
liver	205	130	140	395	232	253		51.8987	56.0345	55.336	liver	54.4231	2.21385
ileum	454	524	419	537	581	487		84.5438	90.1893	86.037	ileum	86.9234	2.9253
kidney	564	544	594	638	578	634		88.4013	94.1176	93.6909	kidney	92.0699	3.18431
Lung	428	405	232	510	447	348		83.9216	90.604	66.6667	lung	80.3974	12.3517
stomach	361	351	424	372	405	541		97.043	86.6667	78.3734	stomach	87.361	9.35416

## Sheet: IF from Figure 8
count	NeuN（green）			Blue				G/B	G/B	G/B		mean	SD
293T	168	178	170	178	181	176		94.382	98.3425	96.5909	293T	96.4385	1.98465
A549	129	95	130	138	104	143		93.4783	91.3462	90.9091	A549	91.9112	1.37462
BLR3A	350	292	301	365	301	319		95.8904	97.01	94.3574	BLR3A	95.7526	1.33166
Caco2	81	42	241	88	44	252		92.0455	95.4545	95.6349	Caco2	94.3783	2.02232
HL7702	27	10	10	104	93	99		25.9615	10.7527	10.101	HL7702	15.6051	8.97487
PC12Adh	259	362	243	277	372	253		93.5018	97.3118	96.0474	PC12Adh	95.6204	1.94058
Atrial	15	41	20	16	42	24		93.75	97.619	83.3333	Atrial	91.5675	7.38871
